# Supplementary material for: Contrasting nanoparticle diffusion in branched polymer and particulate solutions: more than just volume fraction
Source: Royal Society of Chemistry journal article supplement (doi:10.1039/c3sm51774h), 2013-01-01
Supplement: c3sm51774h.pdf [file c3sm51774h.pdf]

## Supporting Information

Contrasting Nanoparticle Diffusion in Branched Polymer and Particulate Solutions: More than  
Just Volume Fraction.

Indermeet Kohli and Ashis Mukhopadhyay

*Department of Physics and Astronomy, Wayne State University, Detroit, MI 48201, United States*

**Figure S1.**

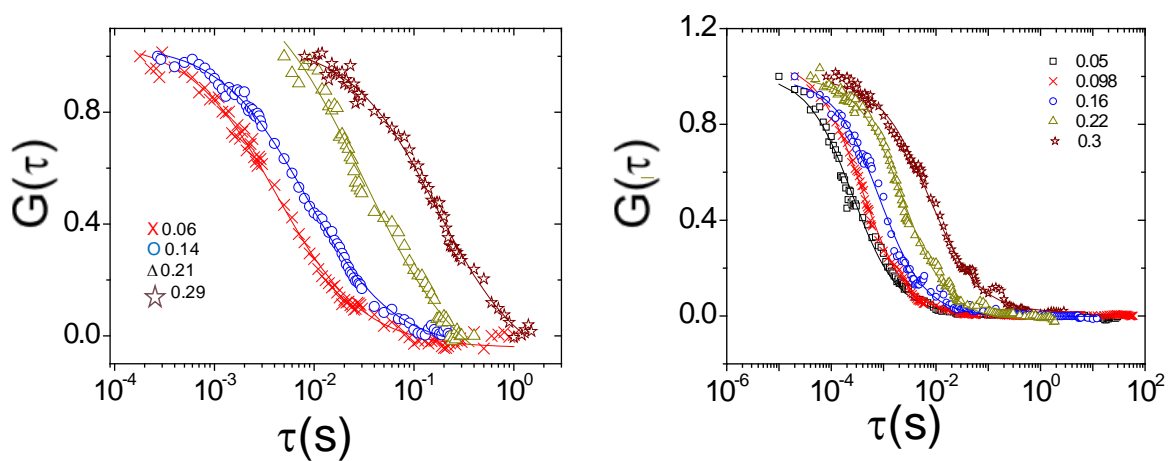

**Figure S1.** (Left) Diffusion of 10 nm AuNP particles in various volume fractions of dextran solutions. (Right) Diffusion of 2.5 nm AuNP particles in various volume fractions of Ludox particles. All fittings are with anomalous subdiffusion model. The fitting gives  $\alpha \approx 1$  in all cases.

**Figure S2.**

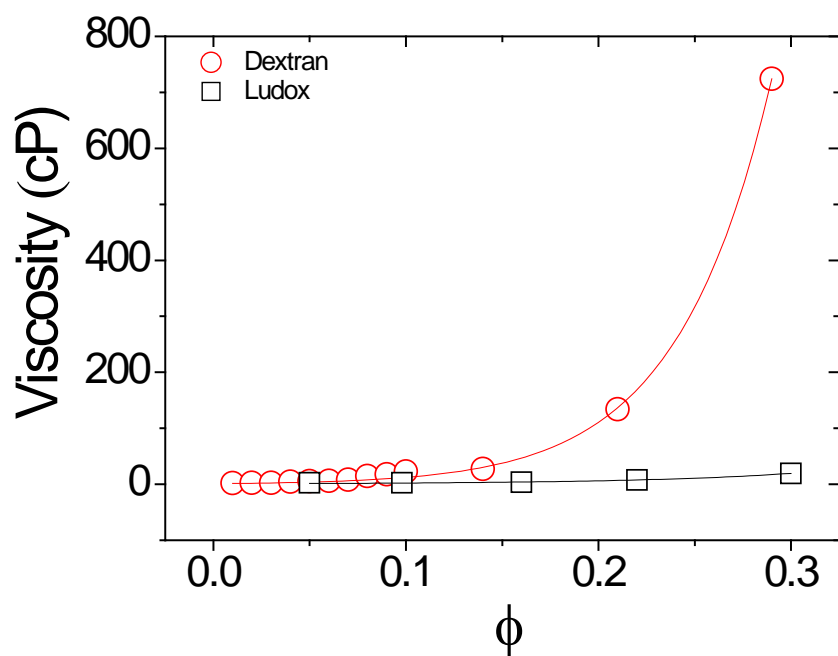

**Figure S2.** Viscosity as a function of volume fraction for dextran and Ludox solutions. The solid line is a stretched exponential fitting.  $\eta = \eta_s \exp(a\phi^b)$ , where  $\eta_s$  is the solvent (water) viscosity, 'a' and 'b' are adjustable parameters. For Ludox solution,  $a=12.7$  and  $b=1.2$  and for dextran solutions  $a=20.2$  and  $b=0.9$ .

**Table S1.**

Phillies fit:  $D = D_0 \exp(-\beta\phi^v)$

Dextran

| Particle radius, $R_0$ (nm) | $\beta$       | $v$             |
|-----------------------------|---------------|-----------------|
| 2.5                         | $8.5 \pm 1.3$ | $0.47 \pm 0.06$ |
| 10                          | $6.9 \pm 2.0$ | $0.45 \pm 0.11$ |

Ludox

| Particle radius, $R_0$ (nm) | $\beta$        | $v$             |
|-----------------------------|----------------|-----------------|
| 2.5                         | $10.9 \pm 1.3$ | $1.01 \pm 0.05$ |
| 10                          | $11.2 \pm 2.9$ | $1.08 \pm 0.12$ |
